# Supplementary material for: Retinoic Acid Receptor-Dependent, Cell-Autonomous, Endogenous Retinoic Acid Signaling and Its Target Genes in Mouse Collecting Duct Cells
Source: PLoS One. 2012 Sep 26;7(9):e45725. doi: 10.1371/journal.pone.0045725 (PMC3458940; doi:10.1371/journal.pone.0045725)
Supplement: Table S1 — 133 intersected genes. (XLS) [file pone.0045725.s004.xls]

## Sheet: All intersected genes (133)
Transcript_cluster_id	Gene Symbol	Gene Title	Fold change AGN193109 vs veh	Fold change AGN193109+tRA vs veh	Fold change DEAB vs veh	Fold change DEAB+tRA vs veh	Entrez Gene
10523128	Ppbp	pro-platelet basic protein	0.10536	0.652673	0.162664	1.84719	57349
10510129	Dhrs3	dehydrogenase/reductase (SDR family) member 3	0.11643	0.264719	0.199271	2.02628	20148
10499899	Sprr1a	small proline-rich protein 1A	0.145989	0.724638	0.216394	2.52859	20753
10366546	Cpm	carboxypeptidase M	0.194288	0.590961	0.43407	1.32501	70574
10464137	9930023K05Rik	RIKEN cDNA 9930023K05 gene	0.229389	0.627346	0.425933	1.59944	226245
10355534	Tns1	tensin 1	0.310314	0.55038	0.436756	1.27221	21961
10412267	Itga2	integrin alpha 2	0.310414	0.860552	0.389906	1.25064	16398
10517727	Klhdc7a	kelch domain containing 7A	0.322462	0.534736	0.473608	1.02873	242721
10522895	Csn3	casein kappa	0.343211	0.523236	0.459456	1.17759	12994
10529515	Sorcs2	sortilin-related VPS10 domain containing receptor 2	0.375816	0.68332	0.487239	1.17753	81840
10375360	Ebf1	early B-cell factor 1	0.37652	0.699583	0.411824	1.32663	13591
10481627	Lcn2	lipocalin 2	0.403041	0.781509	0.562529	1.15615	16819
10356764	2310007B03Rik	RIKEN cDNA 2310007B03 gene	0.433058	0.631082	0.705296	1.00208	71874
10582403	Galns	galactosamine (N-acetyl)-6-sulfate sulfatase	0.441137	0.644358	0.591179	1.06511	50917
10427796	Npr3	natriuretic peptide receptor 3	0.452064	0.9675	0.501446	1.51957	18162
10439087	Muc20	mucin 20	0.478901	0.542088	0.459414	1.08495	224116
10502575	Clca4	chloride channel calcium activated 4	0.483772	1.31741	0.56114	1.9384	229927
10526441	Upk3b	uroplakin 3B	0.487779	0.666865	0.678051	1.07477	100647
10443764	Slc37a1	solute carrier family 37 (glycerol-3-phosphate transporter), member 1	0.500347	0.753424	0.653307	1.16328	224674
10428081	Hrsp12	heat-responsive protein 12	0.505576	0.789676	0.606957	1.05976	15473
10526452	2310043J07Rik	RIKEN cDNA 2310043J07 gene	0.506406	0.711285	0.731552	1.10463	69665
10489204	Tgm2	transglutaminase 2, C polypeptide	0.50705	0.59602	0.667852	1.06703	21817
10436727	ORF63	open reading frame 63	0.514271	0.852241	0.646475	1.19637	224419
10571274	Gsr	glutathione reductase	0.525829	0.79959	0.704823	1.11703	14782
10492330	P2ry1	purinergic receptor P2Y, G-protein coupled 1	0.547843	0.724203	0.695361	1.16425	18441
10467887	Cpn1	carboxypeptidase N, polypeptide 1	0.551819	0.895397	0.625652	1.35229	93721
10376490	Wnt9a	wingless-type MMTV integration site 9A	0.556518	0.830374	0.626376	1.20642	216795
10507152	Cyp4a12b	cytochrome P450, family 4, subfamily a, polypeptide 12B	0.562347	0.79935	0.692619	1.02562	13118
10466304	Dtx4	deltex 4 homolog (Drosophila)	0.570764	0.705524	0.757981	1.24286	207521
10565689	Capn5	calpain 5	0.572508	0.793884	0.757981	1.24286	12337
10594404	Smad3	MAD homolog 3 (Drosophila)	0.573819	0.792968	0.728668	1.10675	17127
10501229	Gstm1	glutathione S-transferase, mu 1	0.57621	0.997001	0.750366	1.1829	14862
10595081	Tinag	tubulointerstitial nephritis antigen	0.578879	0.823896	0.618895	1.03469	26944
10423505	Cmbl	carboxymethylenebutenolidase-like (Pseudomonas)	0.57932	0.699227	0.662672	0.915501	69574
10454172	Dsg2	desmoglein 2	0.588589	0.852635	0.735604	1.11445	13511
10449741	Sik1	salt inducible kinase 1	0.590592	0.730353	0.649319	1.21279	17691
10597182	Nbeal2	neurobeachin-like 2	0.593944	0.847528	0.808359	1.11111	235627
10393266	Foxj1	forkhead box J1	0.596544	0.767745	0.789111	1.04972	15223
10523021	Slc4a4	solute carrier family 4 (anion exchanger), member 4	0.598808	0.900418	1.02716	0.894612	54403
10490129	Bmp7	bone morphogenetic protein 7	0.601179	0.841694	0.769699	1.16832	12162
10581664	Il34	interleukin 34	0.606733	0.896619	0.86792	1.13524	76527
10576088	Gm22	predicted gene 22	0.611165	0.88587	0.657137	1.20918	195209
10349782	Nuak2	NUAK family, SNF1-like kinase, 2	0.615615	0.903336	0.790224	1.10599	74137
10509568	Camk2n1	calcium/calmodulin-dependent protein kinase II inhibitor 1	0.61597	0.766345	0.719068	1.05438	66259
10501222	Gstm2	glutathione S-transferase, mu 2	0.616141	0.857971	0.735094	1.11162	14863
10460666	Ltbp3	latent transforming growth factor beta binding protein 3	0.625176	0.809255	0.797561	1.09759	16998
10399691	Id2	inhibitor of DNA binding 2	0.629378	0.92916	0.762425	1.07351	15902
10422028	Tbc1d4	TBC1 domain family, member 4	0.63031	0.857475	0.716315	1.01487	210789
10401238	Zfp36l1	zinc finger protein 36, C3H type-like 1	0.634196	0.892135	0.721131	1.13288	12192
10558535	Gpr123	G protein-coupled receptor 123	0.640928	0.800367	0.692299	1.07423	52389
10435271	Heg1	HEG homolog 1 (zebrafish)	0.642158	0.934975	0.766841	1.17311	77446
10430660	Pdgfb	platelet derived growth factor, B polypeptide	0.649019	0.92723	0.778445	1.12688	18591
10424667	4930572J05Rik	RIKEN cDNA 4930572J05 gene	0.654894	0.91658	0.852438	1.08623	223626
10516735	Tinagl1	tubulointerstitial nephritis antigen-like 1	0.655197	0.850864	0.79996	1.08774	94242
10548128	Tspan9	tetraspanin 9	0.657319	0.845182	0.720298	1.08172	109246
10417798	Kcnk5	potassium channel, subfamily K, member 5	0.658444	0.850392	0.792509	1.03519	16529
10357239	Tmem37	transmembrane protein 37	0.665049	0.747096	0.793609	1.08455	170706
10485198	Tspan18	tetraspanin 18	0.671317	0.879162	0.808115	1.26529	241556
10555205	Gdpd5	glycerophosphodiester phosphodiesterase domain containing 5	0.673197	0.772354	0.792015	1.17824	233552
10449000	Msln	mesothelin	0.6794	0.868541	0.873775	1.08323	56047
10423471	Ctnnd2	catenin (cadherin associated protein), delta 2	0.686421	0.84327	0.790005	1.23294	18163
10449284	Dusp1	dual specificity phosphatase 1	0.688248	0.99447	0.775393	1.20497	19252
10362511	Gstm3	glutathione S-transferase, mu 3	0.690286	0.995321	0.714332	1.16205	14864
10488060	Jag1	jagged 1	0.691563	1.21363	0.797008	1.25382	16449
10558150	Htra1	HtrA serine peptidase 1	0.693516	1.08348	0.809068	0.984639	56213
10446928	Ltbp1	latent transforming growth factor beta binding protein 1	0.69947	0.946451	0.719234	1.39997	268977
10387138	Usp43	ubiquitin specific peptidase 43	0.716315	0.83243	0.774892	1.0591	216835
10585803	Stra6	stimulated by retinoic acid gene 6	0.716729	0.783968	0.718786	1.36768	20897
10578109	Ubxn8	UBX domain protein 8	0.721464	0.782773	0.749846	0.997001	108159
10460221	Chka	choline kinase alpha	0.723802	0.894612	0.813755	1.11111	12660
10408450	Sox4	SRY-box containing gene 4	0.723953	0.903335	0.782954	1.09885	20677
10445678	1700001C19Rik /// AI661453	RIKEN cDNA 1700001C19 gene /// expressed sequence AI661453	0.742039	0.785146	0.850667	1.05919	75462 /// 224833
10539238	Fam176a	family with sequence similarity 176, member A	0.748306	0.870852	0.776954	1.06782	232146
10523579	Arhgap24	Rho GTPase activating protein 24	0.754504	0.763959	0.889295	0.940044	231532
10360684	Ephx1	epoxide hydrolase 1, microsomal	0.757158	0.722799	0.840508	1.03264	13849
10572097	Sh2d4a	SH2 domain containing 4A	0.76121	0.893166	0.773961	1.0037	72281
10492682	Fam198b	family with sequence similarity 198, member B	0.764541	0.936056	0.788764	1.15562	68659
10468691	Ablim1	actin-binding LIM protein 1	0.768082	0.932602	0.852438	1.04681	226251
10574259	Gpr56	G protein-coupled receptor 56	0.768438	0.868943	0.885972	1.01724	14766
10364093	Derl3	Der1-like domain family, member 3	0.772068	0.968641	0.715108	1.02309	70377
10361897	Ifngr1	interferon gamma receptor 1	0.77414	0.851454	0.798298	1.02645	15979
10376496	Jmjd4	jumonji domain containing 4	0.78057	0.859359	0.911681	1.09429	194952
10535065	Adap1	ArfGAP with dual PH domains 1	0.781852	0.845572	0.88632	0.965803	231821
10580033	Cd97	CD97 antigen	0.786999	0.928495	0.84148	1.02574	26364
10481621	1110008P14Rik	RIKEN cDNA 1110008P14 gene	0.787763	0.887816	0.895852	1.05714	73737
10578045	Nrg1	neuregulin 1	0.800052	1.11296	0.821766	1.26745	211323
10365870	Nr2c1	nuclear receptor subfamily 2, group C, member 1	0.805524	0.83047	0.856386	0.982594	22025
10382328	Sox9	SRY-box containing gene 9	0.806455	1.1106	0.873169	1.22717	20682
10437160	Ets2	E26 avian leukemia oncogene 2, 3' domain	0.808694	0.923382	0.886996	0.99654	23872
10509063	Il22ra1	interleukin 22 receptor, alpha 1	0.812402	0.743893	1.05983	0.869566	230828
10360920	Tgfb2	transforming growth factor, beta 2	0.813248	1.018	0.779705	1.2147	21808
10530841	Igfbp7	insulin-like growth factor binding protein 7	0.824543	1.04681	0.867338	1.07326	29817
10592701	Tmem136	transmembrane protein 136	0.839615	0.931568	0.794104	1	235300
10544596	Tmem176b	transmembrane protein 176B	0.846354	0.939957	0.816958	1.00882	65963
10400504	Foxa1	forkhead box A1	0.848881	0.862064	0.901354	1.01776	15375
10534862	Pcolce	procollagen C-endopeptidase enhancer protein	0.869345	0.764542	0.960817	0.846745	18542
10510574	Errfi1	ERBB receptor feedback inhibitor 1	0.909408	1.1321	0.907519	1.03359	74155
10394674	Gm9847 /// Socs2	suppressor of cytokine signaling 2 pseudogene /// suppressor of cytokine signaling 2	0.953299	1.04174	0.912566	1.07624	100043256 /// 216233
10464560	Aldh3b1	aldehyde dehydrogenase 3 family, member B1	0.968193	0.785128	1.00765	0.832199	67689
10420114	Tgm1	transglutaminase 1, K polypeptide	0.997669	0.770696	1.08073	0.8376	21816
10590445	Snrk	SNF related kinase	1.00649	0.905425	1.08699	0.921464	20623
10538338	9430076C15Rik /// Creb5	RIKEN cDNA 9430076C15 gene /// cAMP responsive element binding protein 5	1.08498	1.19969	0.934759	1.1442	320189 /// 231991
10348653	Gpc1	glypican 1	1.11806	0.904589	1.12324	0.872161	14733
10554240	Isg20	interferon-stimulated protein	1.15429	0.991717	1.08448	0.857574	57444
10462140	Dock8	dedicator of cytokinesis 8	1.16199	0.95244	1.1343	0.876241	76088
10453272	Zfp36l2	zinc finger protein 36, C3H type-like 2	1.16581	1.10369	1.16151	0.93002	12193
10373313	Nab2	Ngfi-A binding protein 2	1.17175	1.08523	1.12298	0.96929	17937
10561128	Cyp2s1	cytochrome P450, family 2, subfamily s, polypeptide 1	1.20924	0.938091	0.927016	0.765815	74134
10514347	Cdkn2b	cyclin-dependent kinase inhibitor 2B (p15, inhibits CDK4)	1.2285	1.01953	1.19361	0.972655	12579
10561104	Axl	AXL receptor tyrosine kinase	1.23828	1.0456	1.14896	0.941696	26362
10458569	Nr3c1	nuclear receptor subfamily 3, group C, member 1	1.23999	1.01092	1.09759	0.8978	14815
10553788	Atp10a	ATPase, class V, type 10A	1.24289	1.02245	1.13001	0.882295	11982
10352867	Plxna2	plexin A2	1.25635	1.03651	1.15191	0.881073	18845
10499394	Lmna	lamin A	1.26488	0.979873	1.1677	0.856386	16905
10453939	Lama3	laminin, alpha 3	1.28248	0.976957	1.04235	0.825267	16774
10536499	Cav1	caveolin 1, caveolae protein	1.30224	1.01654	1.19748	0.901042	12389
10429573	Ly6c1 /// Ly6c2	lymphocyte antigen 6 complex, locus C1 /// lymphocyte antigen 6 complex, locus C2	1.31427	0.986506	1.142	0.833238	17067 /// 100041546
10454782	Egr1	early growth response 1	1.32501	1.23856	1.07078	0.976258	13653
10544036	Atp6v0a4 /// D630045J12Rik	ATPase, H+ transporting, lysosomal V0 subunit A4 /// RIKEN cDNA D630045J12 gene	1.34484	1.10967	1.2086	0.816033	140494 /// 330286
10607738	Car5b	carbonic anhydrase 5b, mitochondrial	1.36194	1.03383	1.12532	0.781147	56078
10357878	Adora1	adenosine A1 receptor	1.38175	1.1466	1.27285	0.922977	11539
10365482	Timp3	tissue inhibitor of metalloproteinase 3	1.38607	0.971532	1.11729	0.870149	21859
10439895	Alcam	activated leukocyte cell adhesion molecule	1.39439	0.996517	1.35871	0.948027	11658
10358124	Pkp1	plakophilin 1	1.40393	1.11242	1.24721	0.831949	18772
10445061	Rnf39	ring finger protein 39	1.44593	1.10548	1.17718	0.838956	386454
10429140	Ndrg1	N-myc downstream regulated gene 1	1.45364	0.976032	1.32103	0.803851	17988
10536294	Peg10	paternally expressed 10	1.52348	1.21254	1.35254	0.863739	170676
10370522	Casp14	caspase 14	1.56031	0.903941	1.15554	0.762055	12365
10402783	Ahnak2	AHNAK nucleoprotein 2	1.56808	0.904798	1.41775	0.703961	100041194
10521602	Cpeb2	cytoplasmic polyadenylation element binding protein 2	1.57251	1.17552	1.23519	0.866257	231207
10380976	Gsdma	gasdermin A	1.61433	0.986005	1.38687	0.752015	57911
10350516	Ptgs2	prostaglandin-endoperoxide synthase 2	1.66517	1.47631	1.23856	0.814884	19225
10414065	Anxa8	annexin A8	1.73243	0.907079	1.4258	0.64836	11752
Genes are sorted based on fold change (smallest to largest) in AGN191309 group
Genes down-regulated by one reagent but up-regulated by another
Gene suppressed by both reagents, which was further suppressed with simultaneous tRA treatment
Gene suppressed by AGN193109 and DEAB; suppression was not reversed/prevented with stimultaneous addition of tRA and AGN193109,
but was reversed with simultaneous addition of tRA and DEAB

## Sheet: Down-regulated genes (94)
Transcript_cluster_id	Gene Symbol	Gene Title	Fold change AGN193109 vs veh	Fold change AGN193109+tRA vs veh	Fold change DEAB vs veh	Fold change DEAB+tRA vs veh	Entrez Gene
10523128	Ppbp	pro-platelet basic protein	0.10536	0.652673	0.162664	1.84719	57349
10510129	Dhrs3	dehydrogenase/reductase (SDR family) member 3	0.11643	0.264719	0.199271	2.02628	20148
10499899	Sprr1a	small proline-rich protein 1A	0.145989	0.724638	0.216394	2.52859	20753
10366546	Cpm	carboxypeptidase M	0.194288	0.590961	0.43407	1.32501	70574
10464137	9930023K05Rik	RIKEN cDNA 9930023K05 gene	0.229389	0.627346	0.425933	1.59944	226245
10355534	Tns1	tensin 1	0.310314	0.55038	0.436756	1.27221	21961
10412267	Itga2	integrin alpha 2	0.310414	0.860552	0.389906	1.25064	16398
10517727	Klhdc7a	kelch domain containing 7A	0.322462	0.534736	0.473608	1.02873	242721
10522895	Csn3	casein kappa	0.343211	0.523236	0.459456	1.17759	12994
10529515	Sorcs2	sortilin-related VPS10 domain containing receptor 2	0.375816	0.68332	0.487239	1.17753	81840
10375360	Ebf1	early B-cell factor 1	0.37652	0.699583	0.411824	1.32663	13591
10481627	Lcn2	lipocalin 2	0.403041	0.781509	0.562529	1.15615	16819
10356764	2310007B03Rik	RIKEN cDNA 2310007B03 gene	0.433058	0.631082	0.705296	1.00208	71874
10582403	Galns	galactosamine (N-acetyl)-6-sulfate sulfatase	0.441137	0.644358	0.591179	1.06511	50917
10427796	Npr3	natriuretic peptide receptor 3	0.452064	0.9675	0.501446	1.51957	18162
10439087	Muc20	mucin 20	0.478901	0.542088	0.459414	1.08495	224116
10502575	Clca4	chloride channel calcium activated 4	0.483772	1.31741	0.56114	1.9384	229927
10526441	Upk3b	uroplakin 3B	0.487779	0.666865	0.678051	1.07477	100647
10443764	Slc37a1	solute carrier family 37 (glycerol-3-phosphate transporter), member 1	0.500347	0.753424	0.653307	1.16328	224674
10428081	Hrsp12	heat-responsive protein 12	0.505576	0.789676	0.606957	1.05976	15473
10526452	2310043J07Rik	RIKEN cDNA 2310043J07 gene	0.506406	0.711285	0.731552	1.10463	69665
10489204	Tgm2	transglutaminase 2, C polypeptide	0.50705	0.59602	0.667852	1.06703	21817
10436727	ORF63	open reading frame 63	0.514271	0.852241	0.646475	1.19637	224419
10571274	Gsr	glutathione reductase	0.525829	0.79959	0.704823	1.11703	14782
10492330	P2ry1	purinergic receptor P2Y, G-protein coupled 1	0.547843	0.724203	0.695361	1.16425	18441
10467887	Cpn1	carboxypeptidase N, polypeptide 1	0.551819	0.895397	0.625652	1.35229	93721
10376490	Wnt9a	wingless-type MMTV integration site 9A	0.556518	0.830374	0.626376	1.20642	216795
10507152	Cyp4a12b	cytochrome P450, family 4, subfamily a, polypeptide 12B	0.562347	0.79935	0.692619	1.02562	13118
10466304	Dtx4	deltex 4 homolog (Drosophila)	0.570764	0.705524	0.757981	1.24286	207521
10565689	Capn5	calpain 5	0.572508	0.793884	0.757981	1.24286	12337
10594404	Smad3	MAD homolog 3 (Drosophila)	0.573819	0.792968	0.728668	1.10675	17127
10501229	Gstm1	glutathione S-transferase, mu 1	0.57621	0.997001	0.750366	1.1829	14862
10595081	Tinag	tubulointerstitial nephritis antigen	0.578879	0.823896	0.618895	1.03469	26944
10423505	Cmbl	carboxymethylenebutenolidase-like (Pseudomonas)	0.57932	0.699227	0.662672	0.915501	69574
10454172	Dsg2	desmoglein 2	0.588589	0.852635	0.735604	1.11445	13511
10449741	Sik1	salt inducible kinase 1	0.590592	0.730353	0.649319	1.21279	17691
10597182	Nbeal2	neurobeachin-like 2	0.593944	0.847528	0.808359	1.11111	235627
10393266	Foxj1	forkhead box J1	0.596544	0.767745	0.789111	1.04972	15223
10490129	Bmp7	bone morphogenetic protein 7	0.601179	0.841694	0.769699	1.16832	12162
10581664	Il34	interleukin 34	0.606733	0.896619	0.86792	1.13524	76527
10576088	Gm22	predicted gene 22	0.611165	0.88587	0.657137	1.20918	195209
10349782	Nuak2	NUAK family, SNF1-like kinase, 2	0.615615	0.903336	0.790224	1.10599	74137
10509568	Camk2n1	calcium/calmodulin-dependent protein kinase II inhibitor 1	0.61597	0.766345	0.719068	1.05438	66259
10501222	Gstm2	glutathione S-transferase, mu 2	0.616141	0.857971	0.735094	1.11162	14863
10460666	Ltbp3	latent transforming growth factor beta binding protein 3	0.625176	0.809255	0.797561	1.09759	16998
10399691	Id2	inhibitor of DNA binding 2	0.629378	0.92916	0.762425	1.07351	15902
10422028	Tbc1d4	TBC1 domain family, member 4	0.63031	0.857475	0.716315	1.01487	210789
10401238	Zfp36l1	zinc finger protein 36, C3H type-like 1	0.634196	0.892135	0.721131	1.13288	12192
10558535	Gpr123	G protein-coupled receptor 123	0.640928	0.800367	0.692299	1.07423	52389
10435271	Heg1	HEG homolog 1 (zebrafish)	0.642158	0.934975	0.766841	1.17311	77446
10430660	Pdgfb	platelet derived growth factor, B polypeptide	0.649019	0.92723	0.778445	1.12688	18591
10424667	4930572J05Rik	RIKEN cDNA 4930572J05 gene	0.654894	0.91658	0.852438	1.08623	223626
10516735	Tinagl1	tubulointerstitial nephritis antigen-like 1	0.655197	0.850864	0.79996	1.08774	94242
10548128	Tspan9	tetraspanin 9	0.657319	0.845182	0.720298	1.08172	109246
10417798	Kcnk5	potassium channel, subfamily K, member 5	0.658444	0.850392	0.792509	1.03519	16529
10357239	Tmem37	transmembrane protein 37	0.665049	0.747096	0.793609	1.08455	170706
10485198	Tspan18	tetraspanin 18	0.671317	0.879162	0.808115	1.26529	241556
10555205	Gdpd5	glycerophosphodiester phosphodiesterase domain containing 5	0.673197	0.772354	0.792015	1.17824	233552
10449000	Msln	mesothelin	0.6794	0.868541	0.873775	1.08323	56047
10423471	Ctnnd2	catenin (cadherin associated protein), delta 2	0.686421	0.84327	0.790005	1.23294	18163
10449284	Dusp1	dual specificity phosphatase 1	0.688248	0.99447	0.775393	1.20497	19252
10362511	Gstm3	glutathione S-transferase, mu 3	0.690286	0.995321	0.714332	1.16205	14864
10488060	Jag1	jagged 1	0.691563	1.21363	0.797008	1.25382	16449
10558150	Htra1	HtrA serine peptidase 1	0.693516	1.08348	0.809068	0.984639	56213
10446928	Ltbp1	latent transforming growth factor beta binding protein 1	0.69947	0.946451	0.719234	1.39997	268977
10387138	Usp43	ubiquitin specific peptidase 43	0.716315	0.83243	0.774892	1.0591	216835
10585803	Stra6	stimulated by retinoic acid gene 6	0.716729	0.783968	0.718786	1.36768	20897
10578109	Ubxn8	UBX domain protein 8	0.721464	0.782773	0.749846	0.997001	108159
10460221	Chka	choline kinase alpha	0.723802	0.894612	0.813755	1.11111	12660
10408450	Sox4	SRY-box containing gene 4	0.723953	0.903335	0.782954	1.09885	20677
10445678	1700001C19Rik /// AI661453	RIKEN cDNA 1700001C19 gene /// expressed sequence AI661453	0.742039	0.785146	0.850667	1.05919	75462 /// 224833
10539238	Fam176a	family with sequence similarity 176, member A	0.748306	0.870852	0.776954	1.06782	232146
10523579	Arhgap24	Rho GTPase activating protein 24	0.754504	0.763959	0.889295	0.940044	231532
10572097	Sh2d4a	SH2 domain containing 4A	0.76121	0.893166	0.773961	1.0037	72281
10492682	Fam198b	family with sequence similarity 198, member B	0.764541	0.936056	0.788764	1.15562	68659
10468691	Ablim1	actin-binding LIM protein 1	0.768082	0.932602	0.852438	1.04681	226251
10574259	Gpr56	G protein-coupled receptor 56	0.768438	0.868943	0.885972	1.01724	14766
10364093	Derl3	Der1-like domain family, member 3	0.772068	0.968641	0.715108	1.02309	70377
10361897	Ifngr1	interferon gamma receptor 1	0.77414	0.851454	0.798298	1.02645	15979
10376496	Jmjd4	jumonji domain containing 4	0.78057	0.859359	0.911681	1.09429	194952
10535065	Adap1	ArfGAP with dual PH domains 1	0.781852	0.845572	0.88632	0.965803	231821
10580033	Cd97	CD97 antigen	0.786999	0.928495	0.84148	1.02574	26364
10481621	1110008P14Rik	RIKEN cDNA 1110008P14 gene	0.787763	0.887816	0.895852	1.05714	73737
10578045	Nrg1	neuregulin 1	0.800052	1.11296	0.821766	1.26745	211323
10365870	Nr2c1	nuclear receptor subfamily 2, group C, member 1	0.805524	0.83047	0.856386	0.982594	22025
10382328	Sox9	SRY-box containing gene 9	0.806455	1.1106	0.873169	1.22717	20682
10437160	Ets2	E26 avian leukemia oncogene 2, 3' domain	0.808694	0.923382	0.886996	0.99654	23872
10360920	Tgfb2	transforming growth factor, beta 2	0.813248	1.018	0.779705	1.2147	21808
10530841	Igfbp7	insulin-like growth factor binding protein 7	0.824543	1.04681	0.867338	1.07326	29817
10592701	Tmem136	transmembrane protein 136	0.839615	0.931568	0.794104	1	235300
10544596	Tmem176b	transmembrane protein 176B	0.846354	0.939957	0.816958	1.00882	65963
10400504	Foxa1	forkhead box A1	0.848881	0.862064	0.901354	1.01776	15375
10510574	Errfi1	ERBB receptor feedback inhibitor 1	0.909408	1.1321	0.907519	1.03359	74155
10394674	Gm9847 /// Socs2	suppressor of cytokine signaling 2 pseudogene /// suppressor of cytokine signaling 2	0.953299	1.04174	0.912566	1.07624	100043256 /// 216233
Genes are sorted based on fold change (smallest to largest) in AGN191309 group

## Sheet: Up-regulated genes (31)
Transcript_cluster_id	Gene Symbol	Gene Title	Fold change AGN193109 vs veh	Fold change AGN193109+tRA vs veh	Fold change DEAB vs veh	Fold change DEAB+tRA vs veh	Entrez Gene
10414065	Anxa8	annexin A8	1.73243	0.907079	1.4258	0.64836	11752
10350516	Ptgs2	prostaglandin-endoperoxide synthase 2	1.66517	1.47631	1.23856	0.814884	19225
10380976	Gsdma	gasdermin A	1.61433	0.986005	1.38687	0.752015	57911
10521602	Cpeb2	cytoplasmic polyadenylation element binding protein 2	1.57251	1.17552	1.23519	0.866257	231207
10402783	Ahnak2	AHNAK nucleoprotein 2	1.56808	0.904798	1.41775	0.703961	100041194
10370522	Casp14	caspase 14	1.56031	0.903941	1.15554	0.762055	12365
10536294	Peg10	paternally expressed 10	1.52348	1.21254	1.35254	0.863739	170676
10429140	Ndrg1	N-myc downstream regulated gene 1	1.45364	0.976032	1.32103	0.803851	17988
10445061	Rnf39	ring finger protein 39	1.44593	1.10548	1.17718	0.838956	386454
10358124	Pkp1	plakophilin 1	1.40393	1.11242	1.24721	0.831949	18772
10439895	Alcam	activated leukocyte cell adhesion molecule	1.39439	0.996517	1.35871	0.948027	11658
10365482	Timp3	tissue inhibitor of metalloproteinase 3	1.38607	0.971532	1.11729	0.870149	21859
10357878	Adora1	adenosine A1 receptor	1.38175	1.1466	1.27285	0.922977	11539
10607738	Car5b	carbonic anhydrase 5b, mitochondrial	1.36194	1.03383	1.12532	0.781147	56078
10544036	Atp6v0a4 /// D630045J12Rik	ATPase, H+ transporting, lysosomal V0 subunit A4 /// RIKEN cDNA D630045J12 gene	1.34484	1.10967	1.2086	0.816033	140494 /// 330286
10454782	Egr1	early growth response 1	1.32501	1.23856	1.07078	0.976258	13653
10429573	Ly6c1 /// Ly6c2	lymphocyte antigen 6 complex, locus C1 /// lymphocyte antigen 6 complex, locus C2	1.31427	0.986506	1.142	0.833238	17067 /// 100041546
10536499	Cav1	caveolin 1, caveolae protein	1.30224	1.01654	1.19748	0.901042	12389
10453939	Lama3	laminin, alpha 3	1.28248	0.976957	1.04235	0.825267	16774
10499394	Lmna	lamin A	1.26488	0.979873	1.1677	0.856386	16905
10352867	Plxna2	plexin A2	1.25635	1.03651	1.15191	0.881073	18845
10553788	Atp10a	ATPase, class V, type 10A	1.24289	1.02245	1.13001	0.882295	11982
10458569	Nr3c1	nuclear receptor subfamily 3, group C, member 1	1.23999	1.01092	1.09759	0.8978	14815
10561104	Axl	AXL receptor tyrosine kinase	1.23828	1.0456	1.14896	0.941696	26362
10514347	Cdkn2b	cyclin-dependent kinase inhibitor 2B (p15, inhibits CDK4)	1.2285	1.01953	1.19361	0.972655	12579
10373313	Nab2	Ngfi-A binding protein 2	1.17175	1.08523	1.12298	0.96929	17937
10453272	Zfp36l2	zinc finger protein 36, C3H type-like 2	1.16581	1.10369	1.16151	0.93002	12193
10462140	Dock8	dedicator of cytokinesis 8	1.16199	0.95244	1.1343	0.876241	76088
10554240	Isg20	interferon-stimulated protein	1.15429	0.991717	1.08448	0.857574	57444
10348653	Gpc1	glypican 1	1.11806	0.904589	1.12324	0.872161	14733
10590445	Snrk	SNF related kinase	1.00649	0.905425	1.08699	0.921464	20623
Genes are sorted based on fold change (largest to smallest) in AGN191309 group

## Sheet: Others (8)
Transcript_cluster_id	Gene Symbol	Gene Title	Fold change AGN193109 vs veh	Fold change AGN193109+tRA vs veh	Fold change DEAB vs veh	Fold change DEAB+tRA vs veh	Entrez Gene
10523021	Slc4a4	solute carrier family 4 (anion exchanger), member 4	0.598808	0.900418	1.02716	0.894612	54403
10509063	Il22ra1	interleukin 22 receptor, alpha 1	0.812402	0.743893	1.05983	0.869566	230828
10464560	Aldh3b1	aldehyde dehydrogenase 3 family, member B1	0.968193	0.785128	1.00765	0.832199	67689
10420114	Tgm1	transglutaminase 1, K polypeptide	0.997669	0.770696	1.08073	0.8376	21816
10538338	9430076C15Rik /// Creb5	RIKEN cDNA 9430076C15 gene /// cAMP responsive element binding protein 5	1.08498	1.19969	0.934759	1.1442	320189 /// 231991
10561128	Cyp2s1	cytochrome P450, family 2, subfamily s, polypeptide 1	1.20924	0.938091	0.927016	0.765815	74134
10360684	Ephx1	epoxide hydrolase 1, microsomal	0.757158	0.722799	0.840508	1.03264	13849
10534862	Pcolce	procollagen C-endopeptidase enhancer protein	0.869345	0.764542	0.960817	0.846745	18542
Genes down-regulated by one reagent but up-regulated by another
Gene suppressed by both reagents, which was further suppressed with simultaneous tRA treatment
Gene suppressed by AGN193109 and DEAB; suppression was not reversed/prevented with stimultaneous addition of tRA and AGN193109,
but was reversed with simultaneous addition of tRA and DEAB
