# Supplementary material for: Retinoic Acid Receptor-Dependent, Cell-Autonomous, Endogenous Retinoic Acid Signaling and Its Target Genes in Mouse Collecting Duct Cells
Source: PLoS One. 2012 Sep 26;7(9):e45725. doi: 10.1371/journal.pone.0045725 (PMC3458940; doi:10.1371/journal.pone.0045725)
Supplement: Table S2 — 270 genes regulated by AGN193109. (XLS) [file pone.0045725.s005.xls]

## Sheet: Genes regulated by AGN193109
Transcript_cluster_id	Gene Symbol	Gene Title	Fold change AGN vs veh	Fold change AGN+tRA vs veh	Entrez Gene
10428308	G930009F23Rik	RIKEN cDNA G930009F23 gene	0.545266	0.770002	100038726
10424662	Psca	prostate stem cell antigen	0.548704	0.840158	72373
10347734	Sgpp2	sphingosine-1-phosphate phosphotase 2	0.553939	0.735756	433323
10424683	Ly6g	lymphocyte antigen 6 complex, locus G	0.569276	0.734941	546644
10478048	Lbp	lipopolysaccharide binding protein	0.584659	0.71094	16803
10571142	Gpr124	G protein-coupled receptor 124	0.585132	0.81658	78560
10385533	Gm12185 /// Tgtp1 /// Tgtp2	predicted gene 12185 /// T-cell specific GTPase 1 /// T-cell specific GTPase 2	0.60193	0.663576	620913 /// 21822 /// 100039796
10370931	Mknk2	MAP kinase-interacting serine/threonine kinase 2	0.612593	0.669273	17347
10446214	Alkbh7	alkB, alkylation repair homolog 7 (E. coli)	0.661983	0.711943	66400
10459084	Synpo	synaptopodin	0.662473	0.741388	104027
10474793	Pak6	p21 protein (Cdc42/Rac)-activated kinase 6	0.69512	0.713244	214230
10531980	Gbp9	guanylate-binding protein 9	0.696937	0.69512	236573
10524631	Oasl1	2''-5'' oligoadenylate synthetase-like 1	0.700019	0.791247	231655
10540523	Lmcd1	LIM and cysteine-rich domains 1	0.705817	0.652146	30937
10405211	Gadd45g	growth arrest and DNA-damage-inducible 45 gamma	0.70889	0.824086	23882
10509267	Wnt4	wingless-related MMTV integration site 4	0.713178	0.7632	22417
10517744	Arhgef10l	Rho guanine nucleotide exchange factor (GEF) 10-like	0.714943	0.807817	72754
10365344	Tcp11l2	t-complex 11 (mouse) like 2	0.719134	0.74924	216198
10518300	Tnfrsf1b	tumor necrosis factor receptor superfamily, member 1b	0.719666	0.779002	21938
10425049	Apol9a /// Apol9b	apolipoprotein L 9a /// apolipoprotein L 9b	0.724337	0.75073	223672 /// 71898
10374202	Adcy1	adenylate cyclase 1	0.734618	0.907142	432530
10560685	Bcl3	B-cell leukemia/lymphoma 3	0.735909	0.866097	12051
10571891	Aadat	aminoadipate aminotransferase	0.736471	1.11948	23923
10567524	4930560O18Rik	RIKEN cDNA 4930560O18 gene	0.740994	0.869104	75838
10349876	Plekha6	pleckstrin homology domain containing, family A member 6	0.748946	0.790516	240753
10590306	Entpd3	ectonucleoside triphosphate diphosphohydrolase 3	0.750297	0.856584	215446
10445325	Rcan2	regulator of calcineurin 2	0.750401	0.860233	53901
10481592	Dnm1	dynamin 1	0.752328	0.82563	13429
10381311	Wnk4	WNK lysine deficient protein kinase 4	0.755638	0.832353	69847
10432439	Fmnl3	formin-like 3	0.756809	0.878857	22379
10500710	BC037703	cDNA sequence BC037703	0.757421	0.890055	242125
10345442	Hs6st1	heparan sulfate 6-O-sulfotransferase 1	0.759085	0.792784	50785
10351880	E430029J22Rik	RIKEN cDNA E430029J22 gene	0.760929	0.80612	100033459
10531994	EG634650 /// Gbp10 /// Gbp8 /// Mpa2l	predicted gene, EG634650 /// guanylate-binding protein 10 /// guanylate-binding protein 8 /// macrophage activation 2 like	0.762143	0.774963	634650 /// 626578 /// 76074 /// 100702
10391407	Ccdc56	coiled-coil domain containing 56	0.762777	0.789129	52469
10481577	Uck1	uridine-cytidine kinase 1	0.765019	0.820552	22245
10386388	Snap47	synaptosomal-associated protein, 47	0.765956	0.872564	67826
10353844	Neurl3	neuralized homolog 3 homolog (Drosophila)	0.765991	0.788692	214854
10546853	Srgap3	SLIT-ROBO Rho GTPase activating protein 3	0.766912	0.853837	259302
10465395	Ppp2r5b	protein phosphatase 2, regulatory subunit B (B56), beta isoform	0.775214	0.947808	225849
10502240	Npnt	nephronectin	0.775393	1.04947	114249
10347807	Col4a3	collagen, type IV, alpha 3	0.776074	0.876849	12828
10435305	Itgb5	integrin beta 5	0.776828	0.84655	16419
10430400	Card10	caspase recruitment domain family, member 10	0.777348	0.827826	105844
10496373	Ddit4l	DNA-damage-inducible transcript 4-like	0.782177	0.86796	73284
10402283	Itpk1	inositol 1,3,4-triphosphate 5/6 kinase	0.782828	0.865297	217837
10445430	Mrpl14	mitochondrial ribosomal protein L14	0.786581	0.82302	68463
10559341	Shank2	SH3/ankyrin domain gene 2	0.787017	0.788637	210274
10382425	Gprc5c	G protein-coupled receptor, family C, group 5, member C	0.787854	0.858764	70355
10579335	Pgpep1	pyroglutamyl-peptidase I	0.788546	0.895729	66522
10378914	Myo18a	myosin XVIIIA	0.790534	0.876262	360013
10519270	Agrn	agrin	0.790772	0.818469	11603
10561031	Lipe	lipase, hormone sensitive	0.792747	0.927616	16890
10390117	Itga3	integrin alpha 3	0.795169	0.930664	16400
10468668	Afap1l2	actin filament associated protein 1-like 2	0.796861	0.780732	226250
10450069	Gm7035 /// H2-Q2	predicted gene 7035 /// histocompatibility 2, Q region locus 2	0.798907	0.902271	630499 /// 15013
10427052	Krt7	keratin 7	0.803665	0.953518	110310
10413398	Il17rd	interleukin 17 receptor D	0.804892	0.870752	171463
10400072	Scin	scinderin	0.808508	1.03742	20259
10388109	Pitpnm3	PITPNM family member 3	0.811765	0.821709	327958
10369844	Bicc1	bicaudal C homolog 1 (Drosophila)	0.813003	0.863539	83675
10380823	Lasp1	LIM and SH3 protein 1	0.814884	0.903753	16796
10402585	Wars	tryptophanyl-tRNA synthetase	0.817713	0.944747	22375
10559343	LOC100048255 /// Shank2	similar to Shank2E /// SH3/ankyrin domain gene 2	0.819605	0.819321	100048255 /// 210274
10409767	Golm1	golgi membrane protein 1	0.820552	0.839518	105348
10348424	Sh3bp4	SH3-domain binding protein 4	0.824391	0.874259	98402
10394778	Hpcal1	hippocalcin-like 1	0.827062	0.931611	53602
10513608	Alad	aminolevulinate, delta-, dehydratase	0.829703	0.871557	17025
10477061	Srxn1	sulfiredoxin 1 homolog (S. cerevisiae)	0.831737	0.973172	76650
10576335	Def8	differentially expressed in FDCP 8	0.832776	0.82283	23854
10515974	Nfyc	nuclear transcription factor-Y gamma	0.836285	0.925133	18046
10380793	Mllt6	myeloid/lymphoid or mixed-lineage leukemia (trithorax homolog, Drosophila); translocated to, 6	0.83977	0.866797	246198
10413874	Ogdhl	oxoglutarate dehydrogenase-like	0.840877	0.797321	239017
10443408	Mapk13	mitogen-activated protein kinase 13	0.843621	0.778984	26415
10358027	Elf3	E74-like factor 3	0.844011	0.739625	13710
10582310	Mvd	mevalonate (diphospho) decarboxylase	0.844401	0.766664	192156
10445293	Pla2g7	phospholipase A2, group VII (platelet-activating factor acetylhydrolase, plasma)	0.845006	0.835667	27226
10597518	Mib1 /// Tgfbr2	mindbomb homolog 1 (Drosophila) /// transforming growth factor, beta receptor II	0.84655	1.00556	225164 /// 21813
10521467	Ccdc96	coiled-coil domain containing 96	0.84698	0.87904	66717
10363056	Sim1	single-minded homolog 1 (Drosophila)	0.84996	0.865057	20464
10413047	Plau	plasminogen activator, urokinase	0.851454	1.07873	18792
10580807	Kifc3	kinesin family member C3	0.852517	0.888186	16582
10526232	Wbscr27	Williams Beuren syndrome chromosome region 27 (human)	0.853305	0.757543	79565
10566694	Olfr504	olfactory receptor 504	0.853561	0.712486	258163
10364722	Efna2	ephrin A2	0.858883	0.88148	13637
10594418	Smad6	MAD homolog 6 (Drosophila)	0.861128	0.879731	17130
10599576	Ppdpf	pancreatic progenitor cell differentiation and proliferation factor homolog (zebrafish)RIKEN cDNA 2700038C09 gene	0.861148	0.988742	66496
10394538	Acaca	acetyl-Coenzyme A carboxylase alpha	0.861347	1.08749	107476
10429160	St3gal1	ST3 beta-galactoside alpha-2,3-sialyltransferase 1	0.864497	0.94748	20442
10505299	Bspry	B-box and SPRY domain containing	0.869244	0.809835	192120
10385175	Wwc1	WW, C2 and coiled-coil domain containing 1	0.874582	0.856584	211652
10526482	Lrwd1 /// Polr2j	leucine-rich repeats and WD repeat domain containing 1 /// polymerase (RNA) II (DNA directed) polypeptide J	0.875998	0.912987	71735 /// 20022
10490053	Zfp217	zinc finger protein 217	0.87971	0.897323	228913
10347697	Slc4a3	solute carrier family 4 (anion exchanger), member 3	0.883233	0.844947	20536
10533849	Rilpl1	Rab interacting lysosomal protein-like 1	0.8863	0.939349	75695
10579532	Bst2	bone marrow stromal cell antigen 2	0.891743	0.960528	69550
10373918	Lif	leukemia inhibitory factor	0.895046	1.05538	16878
10415052	Mmp14	matrix metallopeptidase 14 (membrane-inserted)	0.895356	0.885154	17387
10554463	Hddc3	HD domain containing 3	0.897116	0.950417	68695
10541307	Usp18	ubiquitin specific peptidase 18	0.901667	0.83915	24110
10524659	Pop5	processing of precursor 5, ribonuclease P/MRP family (S. cerevisiae)	0.902334	0.808433	117109
10457924	Bloc1s1	biogenesis of lysosome-related organelles complex-1, subunit 1	0.903127	0.827214	14533
10356406	Ngef	neuronal guanine nucleotide exchange factor	0.907268	0.866137	53972
10524874	Vsig10	V-set and immunoglobulin domain containing 10	0.923766	0.902334	231668
10570201	Atp11a	ATPase, class VI, type 11A	0.932602	0.853029	50770
10388185	Smtnl2	smoothelin-like 2	0.9345	0.712091	276829
10605113	L1cam	L1 cell adhesion molecule	0.939089	0.811502	16728
10486262	Ltk	leukocyte tyrosine kinase	0.939371	0.846902	17005
10474399	Bdnf	brain derived neurotrophic factor	0.940239	1.12977	12064
10452257	Slc25a23	solute carrier family 25 (mitochondrial carrier; phosphate carrier), member 23	0.941696	0.909198	66972
10504402	Tmem8b	transmembrane protein 8B	0.946145	1.10647	242409
10443933	Gm10103	predicted gene 10103	0.959264	0.921273	383232
10364194	Lss	lanosterol synthase	0.960817	0.790224	16987
10529613	Evc	Ellis van Creveld gene homolog (human)	0.96115	0.80666	59056
10523190	Parm1	prostate androgen-regulated mucin-like protein 1	0.966249	0.866477	231440
10496569	Gbp6	guanylate binding protein 6	0.969514	0.773372	229900
10604337	Dcaf12l1	DDB1 and CUL4 associated factor 12-like 1	0.976709	1.11804	245404
10517199	Catsper4	cation channel, sperm associated 4	0.979579	0.839615	329954
10464858	Bbs1	Bardet-Biedl syndrome 1 (human)	0.987373	0.91658	52028
10533213	Oas3	2''-5'' oligoadenylate synthetase 3	0.987646	0.840644	246727
10385507	Gm12185	predicted gene 12185	0.988925	0.84943	620913
10465278	Cdc42ep2	CDC42 effector protein (Rho GTPase binding) 2	0.990686	0.837813	104252
10580056	Gm10644 /// Lphn1	predicted gene 10644 /// latrophilin 1	1.00005	0.894839	100126034 /// 330814
10357084	Serpinb3b	serine (or cysteine) peptidase inhibitor, clade B (ovalbumin), member 3B	1.00696	1.12954	383548
10345791	Il1rl1	interleukin 1 receptor-like 1	1.01508	1.15247	17082
10386427	Flcn	folliculin	1.01511	0.893661	216805
10391577	Hdac5	histone deacetylase 5	1.01797	0.876059	15184
10407797	Prl2c2 /// Prl2c3 /// Prl2c4	prolactin family 2, subfamily c, member 2 /// prolactin family 2, subfamily c, member 3 /// prolactin family 2, subfamily c, member 4	1.02189	1.16481	18811 /// 18812 /// 26421
10386058	Sparc	secreted acidic cysteine rich glycoprotein	1.02219	0.928517	20692
10527115	C330006K01Rik	RIKEN cDNA C330006K01 gene	1.02553	0.869425	231855
10503123	Ubxn2b	UBX domain protein 2B	1.02731	0.912818	68053
10384219	Gm11977	predicted gene 11977	1.03469	0.857871	665339
10607747	Siah1b	seven in absentia 1B	1.04006	0.890755	20438
10537793	Olfr38	olfactory receptor 38	1.04604	1.20751	258988
10460621	1810058N15Rik	RIKEN cDNA 1810058N15 gene	1.04901	0.908736	76513
10533751	Pitpnm2	phosphatidylinositol transfer protein, membrane-associated 2	1.05251	0.928881	19679
10493494	Efna3	ephrin A3	1.06017	0.880402	13638
10371321	Slc41a2	solute carrier family 41, member 2	1.06282	0.874057	338365
10375791	Olfr1378 /// Olfr351 /// Olfr51	olfactory receptor 1378 /// olfactory receptor 351 /// olfactory receptor 51	1.06866	1.25278	258912 /// 258944 /// 18351
10539669	Add2	adducin 2 (beta)	1.06893	0.923852	11519
10410237	2410141K09Rik /// C330022B21Rik /// Gm10324 /// Zfp640	RIKEN cDNA 2410141K09 gene /// RIKEN cDNA C330022B21 gene /// predicted gene 10324 /// zinc finger protein 640	1.0718	1.10824	76803 /// 78699 /// 628709 /// 386626
10393166	1810032O08Rik /// St6galnac2	RIKEN cDNA 1810032O08 gene /// ST6 (alpha-N-acetyl-neuraminyl-2,3-beta-galactosyl-1,3)-N-acetylgalactosaminide alpha-2,6-sialyltransferase 2	1.07948	0.911512	66293 /// 20446
10581132	Cdh16	cadherin 16	1.08298	0.801829	12556
10606714	Gla	galactosidase, alpha	1.08663	1.00814	11605
10544148	Jhdm1d	jumonji C domain-containing histone demethylase 1 homolog D (S. cerevisiae)	1.08875	1.16554	338523
10461828	Olfr1494	olfactory receptor 1494	1.09018	1.33016	258992
10412549	D830030K20Rik /// Gm1973	RIKEN cDNA D830030K20 gene /// predicted gene 1973	1.09237	1.10484	320333 /// 100038846
10449712	Cbs	cystathionine beta-synthase	1.0945	0.958179	12411
10405566	AU042651	expressed sequence AU042651	1.10112	0.873089	328258
10574384	Ndrg4	N-myc downstream regulated gene 4	1.10924	1.00463	234593
10409934	Cts7	cathepsin 7	1.10983	0.956255	56092
10508479	Ptp4a2	protein tyrosine phosphatase 4a2	1.12298	1.0558	19244
10485802	Olfr1309	olfactory receptor 1309	1.1255	1.13126	258439
10541318	Slc6a13	solute carrier family 6 (neurotransmitter transporter, GABA), member 13	1.12805	0.971577	14412
10569494	Tnfrsf22	tumor necrosis factor receptor superfamily, member 22	1.13813	1.07054	79202
10458340	Hbegf	heparin-binding EGF-like growth factor	1.13971	1.26663	15200
10450800	Trim15	tripartite motif-containing 15	1.1448	0.986233	69097
10419578	Ndrg2	N-myc downstream regulated gene 2	1.14682	0.932214	29811
10576046	Foxf1a	forkhead box F1a	1.15114	1.1545	15227
10365518	Nt5dc3	5''-nucleotidase domain containing 3	1.15303	1.13064	103466
10436773	Gm7735 /// Gm9789	predicted gene 7735 /// predicted gene 9789	1.15335	1.36282	665661 /// 640627
10463945	Dusp5	dual specificity phosphatase 5	1.15455	1.24689	240672
10448350	Paqr4 /// Pkmyt1	progestin and adipoQ receptor family member IV /// protein kinase, membrane associated tyrosine/threonine 1	1.15527	0.953408	76498 /// 268930
10585417	Idh3a	isocitrate dehydrogenase 3 (NAD+) alpha	1.15642	1.06708	67834
10440914	Gm9881	predicted gene 9881	1.1568	1.17053	791288
10369567	Hkdc1	hexokinase domain containing 1	1.16025	1.12943	216019
10415791	Rnaseh2b	ribonuclease H2, subunit B	1.166	0.991648	67153
10459496	Ccbe1	collagen and calcium binding EGF domains 1	1.16608	1.20386	320924
10542310	Cdkn1b	cyclin-dependent kinase inhibitor 1B	1.16824	0.96393	12576
10603099	Figf	c-fos induced growth factor	1.16872	1.0009	14205
10454701	Wnt8a	wingless-related MMTV integration site 8A	1.1688	1.17859	20890
10417895	Ppp3cb	protein phosphatase 3, catalytic subunit, beta isoform	1.16932	1.07227	19056
10427402	Ghr	growth hormone receptor	1.16932	1.23428	14600
10584580	Snord14e	small nucleolar RNA, C/D box 14E	1.17167	1.0183	100302594
10578690	Neil3	nei like 3 (E. coli)	1.17365	1.03615	234258
10455942	A730017C20Rik	RIKEN cDNA A730017C20 gene	1.17552	1.1969	225583
10531181	Adamts3	a disintegrin-like and metallopeptidase (reprolysin type) with thrombospondin type 1 motif, 3	1.17674	0.979624	330119
10577190	Rasa3	RAS p21 protein activator 3	1.18127	1.01983	19414
10354494	Nab1	Ngfi-A binding protein 1	1.18181	0.921677	17936
10380116	Rnf43	ring finger protein 43	1.18326	1.00973	207742
10404059	Hist1h1c	histone cluster 1, H1c	1.18591	0.936921	50708
10362073	Sgk1	serum/glucocorticoid regulated kinase 1	1.18597	1.11884	20393
10523483	Prdm8	PR domain containing 8	1.18814	1.13577	77630
10462127	1700021P04Rik	RIKEN cDNA 1700021P04 gene	1.19031	1.11731	75521
10388488	Fam101b	family with sequence similarity 101, member B	1.19527	1.01302	76566
10483023	Rbms1	RNA binding motif, single stranded interacting protein 1	1.19942	1.1287	56878
10361828	Cited2	Cbp/p300-interacting transactivator, with Glu/Asp-rich carboxy-terminal domain, 2	1.19969	1.09051	17684
10560174	Sepw1	selenoprotein W, muscle 1	1.20108	1.11497	20364
10535095	Zfand2a	zinc finger, AN1-type domain 2A	1.20164	1.14103	100494
10494672	Tbx15	T-box 15	1.20227	1.10129	21384
10550660	Ppp1r13l	protein phosphatase 1, regulatory (inhibitor) subunit 13 like	1.20316	1.0796	333654
10571907	Mfap3l	microfibrillar-associated protein 3-like	1.20358	1.0148	71306
10437646	Tekt5	tektin 5	1.20656	0.984571	70426
10389025	Myo1d	myosin ID	1.20748	1.02835	338367
10368947	Aim1	absent in melanoma 1	1.2086	1.00023	11630
10595452	Ube2cbp	ubiquitin-conjugating enzyme E2C binding protein	1.21011	1.1003	70348
10427428	AW549877	expressed sequence AW549877	1.21167	1.0502	106064
10386633	Gm16516	predicted gene, Gm16516	1.21181	1.09786	24082
10396952	Ttc9	tetratricopeptide repeat domain 9	1.21195	1.1014	69480
10519266	Mir200a	microRNA 200a	1.21229	1.14478	387242
10476998	Gm14149	predicted gene 14149	1.2154	1.12114	100038513
10358259	Nek7	NIMA (never in mitosis gene a)-related expressed kinase 7	1.21588	1.04729	59125
10565089	Cpeb1	cytoplasmic polyadenylation element binding protein 1	1.22035	1.19132	12877
10569618	Ano1	anoctamin 1, calcium activated chloride channel	1.22519	0.997462	101772
10439732	Plcxd2	phosphatidylinositol-specific phospholipase C, X domain containing 2	1.22748	1.1126	433022
10402490	4831426I19Rik	RIKEN cDNA 4831426I19 gene	1.22967	1.05792	212073
10377439	Per1	period homolog 1 (Drosophila)	1.23234	0.997508	18626
10397891	D230037D09Rik	RIKEN cDNA D230037D09 gene	1.23297	1.01901	320351
10514072	Zdhhc21	zinc finger, DHHC domain containing 21	1.23485	1.14024	68268
10484261	Cerkl /// Itga4	ceramide kinase-like /// integrin alpha 4	1.23539	1.05185	228094 /// 16401
10482863	Gm13549	lactate dehydrogenase A pseudogene	1.23673	1.05607	625354
10427026	Grasp	GRP1 (general receptor for phosphoinositides 1)-associated scaffold protein	1.23682	1.02378	56149
10591123	Fat3	FAT tumor suppressor homolog 3 (Drosophila)	1.23719	1.24508	270120
10482448	Zeb2	zinc finger E-box binding homeobox 2	1.24378	1.20885	24136
10352448	Dusp10	dual specificity phosphatase 10	1.24476	1.16781	63953
10595753	Trpc1	transient receptor potential cation channel, subfamily C, member 1	1.24744	1.12688	22063
10395702	Akap6	A kinase (PRKA) anchor protein 6	1.24865	1.00672	238161
10411226	F2rl1	coagulation factor II (thrombin) receptor-like 1	1.25093	1.17283	14063
10497689	Gnb4	guanine nucleotide binding protein (G protein), beta 4	1.25238	1.05161	14696
10508115	Stk40	serine/threonine kinase 40	1.25284	1.10168	74178
10456904	F830208F22Rik /// Pstpip2	RIKEN cDNA F830208F22 gene /// proline-serine-threonine phosphatase-interacting protein 2	1.25324	1.07773	619308 /// 19201
10416505	Kctd4	potassium channel tetramerisation domain containing 4	1.2564	1.14942	67516
10531560	Antxr2	anthrax toxin receptor 2	1.25759	1.16986	71914
10569707	Myadm	myeloid-associated differentiation marker	1.26488	1.1178	50918
10600765	Pcyt1b	phosphate cytidylyltransferase 1, choline, beta isoform	1.26628	1.01518	236899
10460253	Aldh3b2	aldehyde dehydrogenase 3 family, member B2	1.26699	1.0091	621603
10471555	Angptl2	angiopoietin-like 2	1.26824	1.05638	26360
10365891	Tmcc3	transmembrane and coiled coil domains 3	1.27456	1.11278	319880
10564417	Aldh1a3	aldehyde dehydrogenase family 1, subfamily A3	1.27978	1.0479	56847
10590909	Endod1	endonuclease domain containing 1	1.28206	1.03905	71946
10440134	Olfr172	olfactory receptor 172	1.29	1.00153	259003
10355893	Epha4	Eph receptor A4	1.29504	1.2778	13838
10584504	Olfr150 /// Olfr919	olfactory receptor 150 /// olfactory receptor 919	1.29678	1.08975	258602 /// 258432
10523156	Cxcl2	chemokine (C-X-C motif) ligand 2	1.29996	1.22643	20310
10442224	BC049807	cDNA sequence BC049807	1.30014	1.11137	381066
10522411	Cwh43	cell wall biogenesis 43 C-terminal homolog (S. cerevisiae)	1.30086	0.986324	231293
10416155	Kctd9	potassium channel tetramerisation domain containing 9	1.30707	1.08172	105440
10473580	Olfr1158	olfactory receptor 1158	1.30955	1.22779	258639
10568873	Adam8	a disintegrin and metallopeptidase domain 8	1.31009	1.03634	11501
10355813	Ptprn	protein tyrosine phosphatase, receptor type, N	1.3137	1.04836	19275
10352905	Cd34	CD34 antigen	1.31373	1.13393	12490
10548905	Eps8	epidermal growth factor receptor pathway substrate 8	1.31798	1.01842	13860
10570855	Plat	plasminogen activator, tissue	1.32776	1.14658	18791
10363901	Etv5	ets variant gene 5	1.3379	1.34037	104156
10583034	Dcun1d5	DCN1, defective in cullin neddylation 1, domain containing 5 (S. cerevisiae)	1.35051	1.2571	76863
10385384	Nipal4	NIPA-like domain containing 4	1.35422	1.25922	214112
10485698	Gm13937	lactate dehydrogenase A pseudogene	1.35548	1.14277	668797
10438091	2610318N02Rik	RIKEN cDNA 2610318N02 gene	1.3562	0.988834	70458
10444883	Cdsn	corneodesmosin	1.3572	1.16907	386463
10515399	Plk3	polo-like kinase 3 (Drosophila)	1.35946	1.31103	12795
10357553	Il24	interleukin 24	1.36418	1.21669	93672
10394593	Fam49a	family with sequence similarity 49, member A	1.36531	1.20489	76820
10372796	Hmga2	high mobility group AT-hook 2	1.37586	1.21841	15364
10516487	Gjb4	gap junction protein, beta 4	1.40555	1.21852	14621
10562192	Fxyd5	FXYD domain-containing ion transport regulator 5	1.41585	1.07599	18301
10569504	Tnfrsf23	tumor necrosis factor receptor superfamily, member 23	1.42241	1.19003	79201
10427461	Ptger4	prostaglandin E receptor 4 (subtype EP4)	1.43687	1.31671	19219
10460585	Ccdc85b /// Fosl1	coiled-coil domain containing 85B /// fos-like antigen 1	1.44273	1.37472	240514 /// 14283
10459772	Lipg	lipase, endothelial	1.44693	0.932817	16891
10564161	Snord116	small nucleolar RNA, C/D box 116 cluster	1.45152	1.45404	64243
10366043	Dusp6	dual specificity phosphatase 6	1.46206	1.26138	67603
10467115	Ankrd22	ankyrin repeat domain 22	1.49775	1.00772	52024
10560709	Pvr	poliovirus receptor	1.51993	1.1607	52118
10406934	Etv1 /// Gm5454	ets variant gene 1 /// predicted gene 5454	1.54456	1.22725	14009 /// 432800
10427035	Nr4a1	nuclear receptor subfamily 4, group A, member 1	1.59914	1.27483	15370
10458555	Spry4	sprouty homolog 4 (Drosophila)	1.62477	1.33102	24066
10403312	Akr1c19	aldo-keto reductase family 1, member C19	1.7258	0.734499	432720
10395457	Etv1	ets variant gene 1	1.76211	1.19397	14009
10577641	1810011O10Rik	RIKEN cDNA 1810011O10 gene	2.06781	1.58425	69068
10523182	Areg	amphiregulin	2.36259	1.27583	11839
Genes suppressed or induced by AGN193109, which was further potentiated with simultaneous tRA treatment
