# Supplementary material for: Retinoic Acid Receptor-Dependent, Cell-Autonomous, Endogenous Retinoic Acid Signaling and Its Target Genes in Mouse Collecting Duct Cells
Source: PLoS One. 2012 Sep 26;7(9):e45725. doi: 10.1371/journal.pone.0045725 (PMC3458940; doi:10.1371/journal.pone.0045725)
Supplement: Table S4 — Gene ontology for 125 candidate target genes. (XLS) [file pone.0045725.s007.xls]

## Sheet: Top 50 diseases
Top 50 diseases (flase-discovery rate<0.05):
	Diseases	pValue
1	Female Urogenital Diseases	4.071e-10
2	Female Urogenital Diseases and Pregnancy Complications	2.663e-09
3	Skin Neoplasms	1.341e-08
4	Genital Diseases, Female	2.235e-08
5	Adnexal Diseases	2.95e-08
6	Fibrosis	5.041e-08
7	Endocrine Gland Neoplasms	1.01e-07
8	Meningioma	1.051e-07
9	Ovarian Diseases	1.109e-07
10	Meningeal Neoplasms	1.169e-07
11	Gonadal Disorders	1.449e-07
12	Ovarian Neoplasms	1.501e-07
13	Breast Neoplasms	1.869e-07
14	Breast Diseases	1.887e-07
15	Hypersensitivity	1.958e-07
16	Carcinoma, Ductal	1.991e-07
17	Hypersensitivity, Immediate	2.055e-07
18	Wounds and Injuries	2.087e-07
19	Genital Neoplasms, Female	2.661e-07
20	Respiratory Tract Diseases	3.344e-07
21	Neoplasms, Ductal, Lobular, and Medullary	3.687e-07
22	Neoplasms, Squamous Cell	3.873e-07
23	Carcinoma, Ductal, Breast	3.936e-07
24	Head and Neck Neoplasms	7.042e-07
25	Leukemia, Myeloid	7.672e-07
26	Lung Diseases	9.039e-07
27	Immune System Diseases	1.233e-06
28	Musculoskeletal Diseases	1.271e-06
29	Neoplasms, Vascular Tissue	1.55e-06
30	Skin Diseases	1.742e-06
31	Urologic Diseases	1.884e-06
32	Carcinoma, Squamous Cell	2.14e-06
33	Urogenital Neoplasms	2.168e-06
34	Central Nervous System Neoplasms	2.304e-06
35	Anoxia	2.644e-06
36	Leukemia, Myeloid, Acute	2.844e-06
37	Signs and Symptoms, Respiratory	2.885e-06
38	Skin and Connective Tissue Diseases	2.923e-06
39	Nervous System Neoplasms	2.956e-06
40	Lung Diseases, Obstructive	3.59e-06
41	Heart Diseases	3.727e-06
42	Carcinoma	3.983e-06
43	Respiratory Hypersensitivity	5.376e-06
44	Hypertension	9.284e-06
45	Myocardial Ischemia	1.086e-05
46	Neoplasms, Nerve Tissue	1.16e-05
47	Pulmonary Fibrosis	1.327e-05
48	Stomach Neoplasms	1.496e-05
49	Nephritis	1.619e-05
50	Asthma	1.687e-05

## Sheet: Top 50 biological processes
Top 50 biological processes (flase-discovery rate<0.05):
	Processes	pValue	Category
1	system development	7.07e-15	(i) Development / morphogenesis
2	anatomical structure development	1.143e-14	(i) Development / morphogenesis
3	organ development	1.475e-14	(i) Development / morphogenesis
4	multicellular organismal development	5.257e-14	(i) Development / morphogenesis
5	anatomical structure morphogenesis	1.446e-13	(i) Development / morphogenesis
6	developmental process	2.782e-13	(i) Development / morphogenesis
7	tissue development	7.715e-13	(i) Development / morphogenesis
8	gland development	9.521e-13	(i) Development / morphogenesis
9	tube development	6.229e-12	(i) Development / morphogenesis
10	positive regulation of cell death	1.765e-11	(ii) Cell fate
11	gland morphogenesis	2.202e-11	(i) Development / morphogenesis
12	response to steroid hormone stimulus	2.972e-11	(iii) Response to stimuli
13	positive regulation of apoptotic process	5.551e-11	(ii) Cell fate
14	positive regulation of programmed cell death	6.598e-11	(ii) Cell fate
15	regulation of cell communication	1.991e-10	(v) Cell communication
16	multicellular organismal process	1.994e-10	(vi) Others
17	regulation of signaling	2.648e-10	(iv) Regulation of signal transduction
18	regulation of cell death	2.917e-10	(ii) Cell fate
19	response to estrogen stimulus	3.709e-10	(iii) Response to stimuli
20	epithelium development	4.045e-10	(i) Development / morphogenesis
21	lung development	4.3e-10	(i) Development / morphogenesis
22	response to external stimulus	4.79e-10	(iii) Response to stimuli
23	respiratory tube development	5.088e-10	(i) Development / morphogenesis
24	positive regulation of cell communication	5.367e-10	(v) Cell communication
25	positive regulation of signaling	6.796e-10	(iv) Regulation of signal transduction
26	regulation of signal transduction	7.076e-10	(iv) Regulation of signal transduction
27	response to oxygen levels	1.009e-09	(iii) Response to stimuli
28	circulatory system development	1.203e-09	(i) Development / morphogenesis
29	cardiovascular system development	1.203e-09	(i) Development / morphogenesis
30	regulation of apoptotic process	2.062e-09	(ii) Cell fate
31	respiratory system development	2.292e-09	(i) Development / morphogenesis
32	response to estradiol stimulus	2.436e-09	(iii) Response to stimuli
33	regulation of programmed cell death	2.496e-09	(ii) Cell fate
34	regulation of transforming growth factor beta receptor signaling pathway	2.518e-09	(iv) Regulation of signal transduction
35	regulation of cell proliferation	2.989e-09	(ii) Cell fate
36	regulation of lipid metabolic process	3.315e-09	(vi) Others
37	cellular response to chemical stimulus	3.753e-09	(iii) Response to stimuli
38	regulation of transmembrane receptor protein serine/threonine kinase signaling pathway	4.289e-09	(iv) Regulation of signal transduction
39	tissue morphogenesis	4.941e-09	(i) Development / morphogenesis
40	cell differentiation	5.068e-09	(ii) Cell fate
41	negative regulation of cell proliferation	5.925e-09	(ii) Cell fate
42	response to extracellular stimulus	6.207e-09	(iii) Response to stimuli
43	urogenital system development	6.299e-09	(i) Development / morphogenesis
44	gliogenesis	7.807e-09	(ii) Cell fate
45	cellular developmental process	1.184e-08	(i) Development / morphogenesis
46	morphogenesis of an epithelium	1.417e-08	(i) Development / morphogenesis
47	positive regulation of phosphatidylinositol 3-kinase cascade	1.68e-08	(iv) Regulation of signal transduction
48	response to hypoxia	1.915e-08	(iii) Response to stimuli
49	positive regulation of signal transduction	2.085e-08	(iv) Regulation of signal transduction
50	tube morphogenesis	2.127e-08	(i) Development / morphogenesis
